# Supplementary material for: Sonic hedgehog signaling in astrocytes mediates cell type-specific synaptic organization
Source: eLife. 2019 Jun 13;8:e45545. doi: 10.7554/eLife.45545 (PMC6629371; doi:10.7554/eLife.45545)
Supplement: Figure 1—source data 1. [file elife-45545-fig1-data1.xlsx]

## Sheet: Summary
Figure 1B - Source Data									Figure 1B Summary Data
Animal 1	S100	Gli1+S100	Gli1/S100 %	Gli1 only	Total	Single-labeled	Total Gli1/Total S100			Gli1/S100 %
L2/3	393	24	0.0610687	0	393	0	0.0610687		L2/3	0.105767
L4	323	102	0.315789	18	341	0.0527859	0.351906		L4	0.440994
L5a	135	26	0.192593	8	143	0.0559441	0.237762		L5	0.356337
L5b	311	102	0.327974	17	328	0.0518293	0.362805		L6	0.220165
L5 (combined)	446	128	0.286996
L6	444	49	0.11036	25	469	0.0533049	0.157783
Animal 2	S100	Gli1+S100	Gli1/S100 %	Gli1 only	Total	Single-labeled	Total Gli1/Total S100
L2/3	389	32	0.0822622	5	394	0.0126904	0.0939086		Figure 1C - Source Data
L4	346	167	0.482659	19	365	0.0520548	0.509589			Gli1+S100 Va	Gli1+S100 Vb	Total Double Labeled	% total Va	% Total Vb
L5a	122	27	0.221311	13	135	0.0962963	0.296296		drg 91 s7L	26	102	128	0.203125	0.796875
L5b	278	110	0.395683	23	301	0.076412	0.44186		drg 112 s6L	27	110	137	0.19708	0.80292
L5 (combined)	400	137	0.3425						drg 370-2 s6L	44	122	166	0.26506	0.73494
L6	337	38	0.11276	14	351	0.039886	0.148148		drg 369-2 s6R	44	95	139	0.316547	0.683453
									Average	35.25	107.25	142.5
									% total dbl	0.247368	0.752632
Animal 3	S100	Gli1+S100	Gli1/S100 %	Gli1 only	Total	Single-labeled	Total Gli1/Total S100
L2/3	243	34	0.139918	16	259	0.0617761	0.19305
L4	364	187	0.513736	33	397	0.0831234	0.554156
L5a	135	44	0.325926	17	152	0.111842	0.401316
L5b	262	122	0.465649	20	282	0.070922	0.503546
L5 (combined)	397	166	0.418136
L6	302	105	0.347682	34	336	0.10119	0.41369
Animal 4	S100	Gli1+S100	Gli1/S100 %	Gli1 only	Total	Single-labeled	Total Gli1/Total S100
L2/3	329	46	0.139818	15	344	0.0436047	0.177326
L4	363	164	0.451791	42	405	0.103704	0.508642
L5a	108	44	0.407407	20	128	0.15625	0.5
L5b	260	95	0.365385	30	290	0.103448	0.431034
L5 (combined)	368	139	0.377717
L6	142	44	0.309859	20	162	0.123457	0.395062
