# Supplementary material for: Sonic hedgehog signaling in astrocytes mediates cell type-specific synaptic organization
Source: eLife. 2019 Jun 13;8:e45545. doi: 10.7554/eLife.45545 (PMC6629371; doi:10.7554/eLife.45545)
Supplement: Figure 2—figure supplement 2—source data 1. [file elife-45545-fig2-figsupp2-data1.xlsx]

## Sheet: Smo qPCR
WT							Gfap Smo cKO
Biological Sample	Technical Replicate	Target Cq Value	Average Cq/sample	Average Gapdh Cq/sample	DCq (Target Cq-Gapdh Cq)		Biological Sample	Technical Replicate	Target Cq Value	Average Cq/sample	Average Gapdh Cq/sample	DCq (Target Cq-Gapdh Cq)
1	1	26.12					4	1	26.9
1	2	26.03					4	2	27.4
1	3	25.74	25.97	18.51	7.45		4	3	27.08	27.13	18.72	8.41
2	1	25.88					5	1	26.94
2	2	25.7					5	2	26.8
2	3	25.44	25.67	18.56	7.12		5	3	26.67	26.8	18.37	8.44
3	1	25.19					6	1	26.27
3	2	25.31					6	2	26.62
3	3	25.38	25.3	18.2	7.1		6	3	26.25	26.38	17.99	8.39
Average:					7.22333		7	1	26.67
							7	2	26.59
							7	3	26.47	26.58	18.17	8.41
							8	1	26.11
							8	2	26.54
							8	3	26.54	26.4	18.29	8.11
							9	1	26.52
							9	2	26.77
							9	3	26.5	26.6	18.35	8.25
							Average:					8.335
