# Supplementary material for: Sonic hedgehog signaling in astrocytes mediates cell type-specific synaptic organization
Source: eLife. 2019 Jun 13;8:e45545. doi: 10.7554/eLife.45545 (PMC6629371; doi:10.7554/eLife.45545)
Supplement: Figure 2—source data 1. [file elife-45545-fig2-data1.xlsx]

## Sheet: P14
WT				mGFAP Smo CKO
Animal #	Cell #	spines/µm		Animal #	Cell #	spines/µm
1	1	0.605086		1	1	0.627683
1	2	0.61151		1	2	0.534507
1	3	0.444066		1	3	0.568634
2	4	0.645452		1	4	0.541309
2	5	0.52509		2	5	0.542104
2	6	0.611515		2	6	0.544938
2	7	0.58248		Average		0.559863
Average		0.575028

## Sheet: P21
WT				mGFAP Smo CKO
Animal #	Cell #	spines/µm		Animal #	Cell #	spines/µm
1	1	0.586587		1	1	0.583053
1	2	0.506569		1	2	0.745874
1	3	0.400572		1	3	0.642444
2	4	0.713849		2	4	0.817832
2	5	0.645686		2	5	0.636587
2	6	0.453845		2	6	0.994015
3	7	0.310572		3	7	0.838773
3	8	0.717658		3	8	1.01768
3	9	0.442032		3	9	0.580789
Average		0.530819		Average		0.761895

## Sheet: P28
WT				mGFAP Smo CKO
Animal #	Cell #	spines/µm		Animal #	Cell #	spines/µm
1	1	0.747748		1	1	0.756426
1	2	0.882154		1	2	0.856928
1	3	0.720423		1	3	0.532973
2	4	0.852081		2	4	0.842941
2	5	0.822725		2	5	0.761767
2	6	0.793746		2	6	0.702858
3	7	0.493974		2	7	0.800051
3	8	0.543947		2	8	0.635294
3	9	0.54151		3	9	0.764084
Average		0.710923		3	10	0.743013
				3	11	0.359555
				Average		0.705081

## Sheet: P42
WT				mGFAP Smo CKO
Animal #	Cell #	spines/µm		Animal #	Cell #	spines/µm
1	1	0.584925		1	1	0.698
1	2	0.643902		1	2	0.746734
1	3	0.4781		1	3	0.843693
1	4	0.602		2	4	0.809501
2	5	0.59783		2	5	0.589489
2	6	0.368756		2	6	0.50768
2	7	0.531546		2	7	0.817382
3	8	0.537059		2	8	0.741215
3	9	0.505382		2	9	0.952064
3	10	0.607558		3	10	0.856341
3	11	0.228816		3	11	0.544068
Average		0.516898		3	12	0.432476
				Average		0.711554

## Sheet: Adult
WT				mGFAP Smo CKO
Animal #	Cell #	spines/µm		Animal #	Cell #	spines/µm
1	1	0.394		1	1	0.718
1	2	0.391		1	2	0.434
1	3	0.242		1	3	0.58
2	4	0.669524		2	4	0.600365
2	5	0.370129		2	5	0.636752
2	6	0.433895		2	6	0.609431
2	7	0.524479		2	7	0.412291
3	8	0.388155		2	8	0.441179
3	9	0.302463		2	9	0.587041
3	10	0.280428		2	10	0.589896
3	11	0.401671		2	11	0.746154
3	12	0.228622		2	12	0.645088
3	13	0.473457		3	13	0.49588
3	14	0.414578		3	14	0.585643
3	15	0.169756		3	15	0.522081
3	16	0.409336		3	16	0.702923
4	17	0.393472		3	17	0.576727
4	18	0.237213		3	18	0.759253
4	19	0.440609		4	19	0.614271
4	20	0.346621		4	20	0.559103
4	21	0.271919		4	21	0.463649
4	22	0.313628		4	22	0.815415
4	23	0.294268		4	23	0.706883
4	24	0.347213		Average		0.600088
Average		0.364102

## Sheet: Layer II III
WT				mGFAP Smo CKO
Animal #	Cell #	spines/µm		Animal #	Cell #	spines/µm
1	1	0.967992		1	1	0.692018
2	2	0.485651		2	2	0.699267
2	3	0.75456		3	3	0.542043
3	4	0.89351		3	4	0.784458
3	5	0.799176		3	5	0.937936
3	6	0.824218		4	6	0.61838
4	7	0.7877		4	7	0.668663
Average		0.787544		5	8	1.17395
				5	9	0.725253
				Average		0.760219

## Sheet: CA1
WT				mGFAP Smo CKO
Animal #	Cell #	spines/µm		Animal #	Cell #	spines/µm
1	1	0.877936		1	1	0.64635
1	2	0.867918		1	2	0.673237
1	3	0.931241		1	3	0.938386
1	4	0.673863		1	4	1.01655
1	5	0.829777		1	5	1.08042
2	6	1.22143		2	6	0.836854
2	7	1.13488		2	7	0.77987
2	8	1.16059		2	8	0.746722
3	9	0.936926		3	9	1.19146
3	10	0.97141		3	10	0.973651
3	11	1.09536		3	11	0.999526
Average		0.972848		Average		0.898458

## Sheet: CK2 Layer V
WT				CK2 Smo CKO
Animal #	Cell #	spines/µm		Animal #	Cell #	spines/µm
1	1	0.610027		1	1	0.577
1	2	0.757279		1	2	0.509
1	3	0.615644		1	3	0.319
2	4	0.607533		2	4	0.543
2	5	0.746142		2	5	0.818
2	6	0.839878		2	6	0.747
3	7	0.712925		3	7	0.746082
3	8	1.00284		3	8	0.676753
3	9	0.507492		3	9	0.344353
3	10	1.25543		Average		0.586688
Average		0.765519

## Sheet: LV Basal Dendrites
WT				mGFAP Smo CKO
Animal #	Cell #	spines/µm		Animal #	Cell #	spines/µm
1	1	0.607806		1	1	0.578828
1	2	0.363128		1	2	0.509233
1	3	0.678068		1	3	0.520508
2	4	0.726166		2	4	0.841384
2	5	0.758877		2	5	0.588168
2	6	0.65488		2	6	0.776166
3	7	0.560936		3	7	0.674467
3	8	0.471815		3	8	0.516688
3	9	0.591866		3	9	0.701254
3	10	0.608594		3	10	0.513205
Average		0.602214		Average		0.62199
