# Supplementary material for: Sonic hedgehog signaling in astrocytes mediates cell type-specific synaptic organization
Source: eLife. 2019 Jun 13;8:e45545. doi: 10.7554/eLife.45545 (PMC6629371; doi:10.7554/eLife.45545)
Supplement: Figure 3—source data 1. [file elife-45545-fig3-data1.xlsx]

## Sheet: Fig3D
Fig 3D
Mouse-Cell	Stable	Elim	Form	Filo	Spines	Turnover	TO average by mouse
P17-21 Ctrl
3296-1	219	34	21	175	274	0.113
3296-2	171	41	33	174	245	0.178	0.1455
AB102-1	181	42	12	127	235	0.13
AB102-2	173	40	24	112	237	0.156098	0.143049
AB105-1	217	25	15	134	257	0.0843882
AB105-2	107	10	7	68	124	0.0735931	0.0789906
AB23-1	180	68	35	146	283	0.222462
AB23-2	119	29	18	125	166	0.164912	0.193687
AB61-1	84	22	18	49	124	0.192308
AB61-2	295	43	28	289	366	0.107413	0.14986
P17-21 SmoCKO
AB182-1	247	38	26	174	311	0.115	0.115
AB104-1	188	43	8	78	239	0.119	0.119
AB31-1	332	48	19	87	399	0.092	0.092
AB62-1	306	50	26	139	382	0.11	0.11
P28-32 Ctrl
AB143-1	270	29	19	85	318	0.082
AB143-2	157	20	10	64	187	0.09	0.086
AB145-1	182	26	8	138	216	0.063
AB145-2	229	15	16	86	260	0.088	0.0755
AB168-1	136	28	19	178	183	0.15	0.15
P28-32 SmoCKO
AB133-1	160	27	21	71	208	0.129
AB133-2	179	29	7	100	215	0.091	0.11
2065-1	209	28	8	35	245	0.079	0.079
2229-1	191	44	14	59	249	0.124	0.124
2247-1	338	45	33	61	416	0.103	0.103

## Sheet: Fig3E
Fig 3E
Mouse-Cell	Stable	Elim	Form	Filo	Spines	Turnover	TO by Mouse
Adult Ctrl
2222-1	404	38	12	84	454	0.056	0.056
2505-1	248	26	35	151	309	0.11
2505-2	224	29	19	105	272	0.096	0.103
AB107-1	250	11	40	57	301	0.092	0.092
AB214-1	258	24	17	74	299	0.074	0.074
1329-1	203	42	13	17	258	0.119	0.119
1727-1	243	29	19	22	291	0.09	0.09
4380-1	137	10	8	44	155	0.057	0.057
AB51-1	242	20	11	53	273	0.058	0.058
Adult SmoCKO
1556-1	550	40	30	40	620	0.06	0.06
2220-1	217	18	14	27	249	0.069	0.069
2221-1	376	26	22	59	424	0.06	0.06
AB110-1	192	14	9	28	215	0.057	0.057
4073-1	114	13	14	68	141	0.106	0.106
1797-1	319	29	29	18	377	0.086	0.086
AB287	223	21	14	57	258	0.073	0.073
AB215-1	174	15	22	110	211	0.096
AB215-2	99	9	9	30	114	0.083	0.0895

## Sheet: Fig3F
Fig 3F
Mouse-Cell	% Filopodia	By Mouse
Juv Ctrl
3296-1	28.6
3296-2	27.5	28.05
AB102-1	23
AB102-2	24.2	23.6
AB105-1	21.2
AB105-2	24.4	22.8
AB23-1	26.2
AB23-2	31.2	28.7
AB61-1	21.2
AB61-2	35.7	28.45
AB143-1	14.1
AB143-2	16.8	15.45
AB145-2	15.5
AB168-1	38.2	26.85
Juv SmoCKO
3299-1	17.4	17.4
AB182-1	26.5	26.5
AB104-1	20.2	20.2
AB62-1	20.7	20.7
AB181-1	20.9	20.9
AB31-1	13.1
AB31-2	2.5	7.8
AB133-1	18.7
AB133-2	17.8	18.25
AB135-1	11.1
AB135-2	13.5	12.3
2065-1	8.9	8.9
2229-1	14.4	14.4
Adult Ctrl
AB217-1	31.8	31.8
AB216-1	13.1	13.1
2222-1	11.4	11.4
AB201-1	13	13
AB204-1	12.7
AB204-2	27.8	20.25
2494-1	22.6	22.6
2497-1	7.6	7.6
2505-1	22.9
2505-2	19.3	21.1
2837-1	11.4
2837-2	15	13.2
AB107-1	13.1	13.1
AB51-1	9.9	9.9
3793	12.3	12.3
AB214-1	11.8	11.8
1329-1	6.4	6.4
1727-1	8.2
1727-2	16.4	12.3
4380-1	14.7	14.7
Adult SmoCKO
1797-1	8.7	8.7
2220-1	6.8	6.8
2221-1	8.7	8.7
1556-1	6.5	6.5
AB110-1	10.7	10.7
AB215-1	19.5
AB215-2	15.5	17.5
4073-1	24.9	24.9

## Sheet: Fig3G
Fig3G
Wild-Type				SmoCKO
Mouse-Cell				Mouse-Cell
2222-1				2221-1
Day	Nspine	Survival		Day	Nspine	Survival
0	269	1		0	168	1
1	259	0.962825		1	162	0.964286
2	247	0.918216		2	161	0.958333
7	242	0.899628		7	159	0.946429
14	234	0.869888		14	148	0.880952
21	228	0.847584		21	144	0.857143
49	216	0.802974		49	132	0.785714
AB107-1				1556-1
Day	Nspine	Survival		Day	Nspine	Survival
0	123	1		0	176	1
1	113	0.918699		1	168	0.954545
2	108	0.878049		2	166	0.943182
7	107	0.869919		7	162	0.920455
15	97	0.788618		14	153	0.869318
29	93	0.756098		42	150	0.852273
46	85	0.691057		AB110-1
1727-1				Day	Nspine	Survival
Day	Nspine	Survival		0	189	1
0	232	1		1	177	0.936508
1	216	0.931034		2	168	0.888889
2	205	0.883621		7	163	0.862434
8	184	0.793103		14	154	0.814815
15	175	0.75431		35	142	0.751323
43	159	0.685345		1797-1
71	146	0.62931		Day	Nspine	Survival
2505-1				0	218	1
Day	Nspine	Survival		1	207	0.949541
0	166	1		2	195	0.894495
1	160	0.963855		8	188	0.862385
2	153	0.921687		15	181	0.830275
7	144	0.86747		36	167	0.766055
14	132	0.795181		AB287-1
21	123	0.740964		Day	Nspine	Survival
49	112	0.674699		0	147	1
AB204-1				1	142	0.965986
Day	Nspine	Survival		2	139	0.945578
0	101	1		6	134	0.911565
2	94	0.930693		13	132	0.897959
4	91	0.90099		20	126	0.857143
6	87	0.861386		28	123	0.836735
8	85	0.841584		34	117	0.795918
13	82	0.811881		42	114	0.77551
21	76	0.752475		54	113	0.768707
38	72	0.712871		76	110	0.748299
AB217-1
Day	Nspine	Survival
0	168	1
2	156	0.928571
4	152	0.904762
6	147	0.875
8	145	0.863095
13	138	0.821429
18	136	0.809524
28	134	0.797619
AB214-1
Day	Nspine	Survival
0	238	1
1	219	0.920168
2	210	0.882353
7	201	0.844538
11	193	0.810924
14	187	0.785714
21	179	0.752101
31	175	0.735294
42	164	0.689076
53	157	0.659664

## Sheet: Fig3H
Fig3H
	WT	SmoCKO
Stable	70.916	78.073
Recurrent	12.58	8.914
Persistent	16.503	18.047
