# Supplementary material for: Sonic hedgehog signaling in astrocytes mediates cell type-specific synaptic organization
Source: eLife. 2019 Jun 13;8:e45545. doi: 10.7554/eLife.45545 (PMC6629371; doi:10.7554/eLife.45545)
Supplement: Figure 4—source data 1. [file elife-45545-fig4-data1.xlsx]

## Sheet: GAPDH ddPCR
WT					CK2 Smo cKO					Gfap Smo cKO
Biological Sample	Technical Replicate	Concentration (copies/ug RNA)	Average Concentration/sample		Biological Sample	Technical Replicate	Concentration (copies/ug RNA)	Average Concentration/sample		Biological Sample	Technical Replicate	Concentration (copies/ug RNA)	Average Concentration/sample
1	1	52560000			1	1	67200000			1	1	48800000
1	2	57600000			1	2	46200000			1	2	29280000	39040000
1	3	65400000	58520000		1	3	55600000	5.63333e+07		2	1	61800000
2	1	67800000			2	1	35520000			2	2	45900000
2	2	69200000			2	2	40400000			2	3	65400000	57700000
2	3	74600000	7.05333e+07		2	3	54800000	4.35733e+07		3	1	41800000
3	1	51800000			3	1	33420000			3	2	42000000
3	2	40500000			3	2	39960000			3	3	3.984e+07	4.12133e+07
3	3	43920000	4.54067e+07		3	3	47000000	4.01267e+07		4	1	55200000
4	1	51600000			4	1	62400000			4	2	39420000
4	2	43200000			4	2	67200000			4	3	46000000	4.68733e+07
4	3	43680000	46160000		4	3	71200000	6.69333e+07		Average:			4.62067e+07
5	1	68400000			Average:			5.17417e+07
5	2	4.686e+07
5	3	46800000	54020000
Average:			54928000

## Sheet: Kir4.1 ddPCR
WT					CK2 Smo cKO					Gfap Smo cKO
Biological Sample	Technical Replicate	Concentration (copies/ug RNA)	Average Concentration/sample		Biological Sample	Technical Replicate	Concentration (copies/ug RNA)	Average Concentration/sample		Biological Sample	Technical Replicate	Concentration (copies/ug RNA)	Average Concentration/sample
1	1	1874000			1	1	2144000			1	1	1126000
1	2	1764000			1	2	2092000			1	2	780000
1	3	1648000	1762000		1	3	1920000	2052000		1	3	492800	799600
2	1	2500000			2	1	1486000			2	1	1072000
2	2	2196000			2	2	1460000			2	2	920000
2	3	2192000	2296000		2	3	1208000	1.38467e+06		2	3	888000	960000
3	1	2640000			3	1	1302000			3	1	1040000
3	2	2360000			3	2	1228000			3	2	976000
3	3	2336000	2.44533e+06		3	3	1136000	1222000		3	3	976000	997333
4	1	1244000			4	1	3020000			4	1	1324000
4	2	1468000			4	2	2728000			4	2	1400000
4	3	1400000	1.37067e+06		4	3	2896000	2.88133e+06		4	3	912000	1212000
5	1	1628000			Average:			1885000		Average:			992233
5	2	1600000
5	3	1560000	1596000
6	1	2514000
6	2	2440000
6	3	2456000	2470000
Average:			1990000

## Sheet: GLAST ddPCR
WT					Gfap Smo cKO
Biological Sample	Technical Replicate	Concentration (copies/ug RNA)	Average Concentration/sample		Biological Sample	Technical Replicate	Concentration (copies/ug RNA)	Average Concentration/sample
1	1	7280000			1	1	6.32432e+06
1	2	7968000			1	2	6.3027e+06
1	3	8480000	7.90933e+06		1	3	7.48108e+06	6.7027e+06
2	1	6440000			2	1	5720000
2	2	6592000			2	2	5344000
2	3	6592000	6.54133e+06		2	3	5664000	5576000
3	1	7240000			3	1	7848000
3	2	7856000			3	2	7600000
3	3	8352000	7816000		3	3	8032000	7.82667e+06
Average:			7.42222e+06		Average:			6.70179e+06

## Sheet: Glt1 ddPCR
WT					Gfap Smo cKO
Biological Sample	Technical Replicate	Concentration (copies/ug RNA)	Average Concentration/sample		Biological Sample	Technical Replicate	Concentration (copies/ug RNA)	Average Concentration/sample
1	1	11280000			1	1	10000000
1	2	12608000			1	2	9.71892e+06
1	3	12416000	1.21013e+07		1	3	9.66486e+06	9.79459e+06
2	1	9600000			2	1	9360000
2	2	9568000			2	2	9760000
2	3	10592000	9920000		2	3	10208000	9776000
3	1	10880000			3	1	9120000
3	2	9776000			3	2	9360000
3	3	10688000	10448000		3	3	9024000	9168000
Average:			1.08231e+07		Average:			9.57953e+06

## Sheet: Megf10 qPCR
WT							Gfap Smo cKO
Biological Sample	Technical Replicate	Target Cq Value	Average Target Cq/sample	Average Gapdh Cq/sample	DCq (Target Cq-Gapdh Cq)		Biological Sample	Technical Replicate	Target Cq Value	Average Target Cq/sample	Average Gapdh Cq/sample	DCq (Target Cq-Gapdh Cq)
1	1	27.3178					4	1	26.855
1	2	27.1988					4	2	26.9783
1	3	27.4582	27.3249	18.948	8.37687		4	3	26.9952	26.9428	18.984	7.95879
2	1	27.7501					5	1	26.0411
2	2	26.9916					5	2	26.0008
2	3	27.2337	27.3251	18.9022	8.42298		5	3	26.2166	26.0862	18.7053	7.38088
3	1	26.1098					6	1	25.9536
3	2	26.0298					6	2	25.7808
3	3	26.3208	26.1534	18.8941	7.25933		6	3	26.1223	25.9522	18.5412	7.41095
Average:					8.01973		7	1	26.1694
							7	2	26.2187
							7	3	26.2693	26.2191	18.648	7.57111
							8	1	26.1912
							8	2	25.9689
							8	3	26.3215	26.1606	18.8095	7.35102
							9	1	27.0501
							9	2	26.7151
							9	3	27.5797	27.115	18.6615	8.45351
							Average:					7.68771

## Sheet: Mertk qPCR
WT							Gfap Smo cKO
Biological Sample	Technical Replicate	Target Cq Value	Average Target Cq/sample	Average Gapdh Cq/sample	DCq (Target Cq-Gapdh Cq)		Biological Sample	Technical Replicate	Target Cq Value	Average Target Cq/sample	Average Gapdh Cq/sample	DCq (Target Cq-Gapdh Cq)
1	1	25.4019					4	1	24.8302
1	2	25.4199					4	2	24.323
1	3	25.3237	25.3818	18.948	6.43379		4	3	24.9192	24.6908	18.6615	6.02931
2	1	24.6037					5	1	24.6672
2	2	24.6565					5	2	24.5932
2	3	24.6596	24.6399	18.9022	5.73777		5	3	24.6965	24.6523	18.984	5.66828
3	1	24.6747					6	1	24.7238
3	2	24.6172					6	2	24.7012
3	3	24.634	24.6419	18.8941	5.74783		6	3	24.5476	24.6575	18.7053	5.95225
Average:					5.97313		7	1	24.4406
							7	2	24.5186
							7	3	24.6794	24.5462	18.5412	6.00495
							8	1	24.2923
							8	2	24.3111
							8	3	24.6519	24.4184	18.648	5.77038
							9	1	24.6658
							9	2	24.3737
							9	3	24.6509	24.5635	18.8095	5.75392
							Average:					5.86318
