# Supplementary material for: Sonic hedgehog signaling in astrocytes mediates cell type-specific synaptic organization
Source: eLife. 2019 Jun 13;8:e45545. doi: 10.7554/eLife.45545 (PMC6629371; doi:10.7554/eLife.45545)
Supplement: Figure 5—source data 1. [file elife-45545-fig5-data1.xlsx]

## Sheet: Sheet1
mGFAP Smo CKO
Animal	Cell	Age (PD)	Holding potential	resting membrane potential (mV)	imput resistance	input resisance (*-10)	tau	AP threshold	AP peak amplitude (mV)	AP 1/2 width (ms)
1	1	P21	70	-71.2753	-9.01337	90.1337	7.64338	-38.94	72.2656	0.7
1	2	P21	70	-67.8009	-9.62219	96.2219	8.3958	-38.77	72.7844	0.8
2	3	P21	70	-66.127	-9.36737	93.6737	15.5971	-30.91	68.6646	0.7
2	4	P21	70	-59.6771	-13.4613	134.613	17.4829	-30.61	62.1033	0.8
2	5	P21	70	-72.52	-8.70819	87.0819	12.5631	-37.6	71.27	0.8
3	7	P21	70	-61.1603	-5.80292	58.0292	9.47028	-44.59	79.2236	0.8
3	8	P21	70	-47.496	-4.75464	47.5464	11.1187	-43.58	86.8225	0.7
Average				-63.7224	-8.67571	86.7571	11.753	-37.8571	73.3049	0.757143
WT
Animal	Cell	Age (PD)	Holding potential	resting membrane potential (mV)	imput resistance	input resisance (*-10)	tau	AP threshold	AP peak amplitude (mV)	AP 1/2 width (ms)
1	1	P21	70	-58.7875	-14.3112	143.112	10.9726	-30.95	55.8167	0.8
1	2	P21	70	-62.3596	-15.2466	152.466	12.8522	-29.81	51.8188	0.8
2	3	P21	70	-45.015	-10.7941	107.941	12.5795	-11.92	72.0215	1
2	4	P21	70	-59.5703	-32.6843	326.843	17.6401	-34.42	57.4646	1.5
3	5	P21	70	-61.0138	-11.6394	116.394	11.9977	-31.37	55.542	0.7
3	6	P21	70	-63.6551	-12.0117	120.117	11.6279	-28.22	45.6543	0.8
4	7	P21	70	-67.804	-13.858	138.58	10.6437	-35.88	60.2722	1
4	8	P21	70	-58.7112	-7.17468	71.7468	7.93374	-32.92	62.7136	0.8
4	9	P21	70	-66.0294	-5.41992	54.1992	11.7136	-31.87	54.9316	0.8
4	10	P21	70	-61.3007	-10.9421	109.421	10.9984	-33.84	74.8596	1.2
4	11	P21	70	-48.8678	-9.63135	96.3135	10.3568	-35.34	64.8499	1.6
Average				-59.374	-13.0649	130.648	11.756	-30.5945	59.6313	1
WT
Animal	Cell	ID	50pA	100pA	150 pA	200 pA	250 pA	300 pA	350 pA	400 pA	450pA	500 pA	550 pA	600 pA	650 pA	Total spikes
1	1	18731007		1	6	17	18	23	22	12	11	10	8	12	12	152
1	2	18731008		1	2	9	20	24	28	29	33	30	25	16	19	236
2	3	18803000		8	14	17	19	21	17	19	17	15	13	11	7	178
2	4	18803004	2	7	11	13	13	10	8	5	3	3	2	2	2	81
3	5	18803008			1	11	26	38	47	53	57	60	60	38	31	422
3	6	18803009				1	4	13	28	37	42	36	36	36	24	257
4	7	18927000		14	26	36	45	53	60	66	70	75	81	74	101	701
4	8	18927002			13	22	29	39	42	53	53	59	59	64	78	511
4	9	18927003				4	16	25	32	39	45	52	57	62	67	399
4	10	18927004			5	19	30	37	44	49	47	54	35	27	30	377
4	11	18927005		11	25	32	35	47	34	24	17	15	14	10	6	270
			2	7	11.4444	16.4545	23.1818	30	32.9091	35.0909	35.9091	37.1818	35.4545	32	34.2727
mGFAP Smo CKO
Animal	Cell	ID	50pA	100pA	150 pA	200 pA	250 pA	300 pA	350 pA	400 pA	450pA	500 pA	550 pA	600 pA	650 pA	Total spikes
1	1	18731003				12	30	39	45	52	58	62	66	70	54	488
1	2	18731004			2	10	20	27	33	40	41	41	43	42	26	325
2	3	18821000			13	21	28	35	39	45	49	53	56	60	62	461
2	4	18821001	7	21	33	42	50	57	62	66	70	71	71	72	71	693
2	5	18821003	0	8	24	30	34	36	39	42	45	47	49	51	52	457
3	7	18927009			32	41	47	59	69	75	81	87	90	93	93	767
3	8	18927010	13	23	39	51	60	66	74	79	83	85	88	87	95	830
			6.66667	17.3333	23.8333	29.5714	38.4286	45.5714	51.5714	57	61	63.7143	66.1429	67.8571	64.7143
