# Supplementary material for: Sonic hedgehog signaling in astrocytes mediates cell type-specific synaptic organization
Source: eLife. 2019 Jun 13;8:e45545. doi: 10.7554/eLife.45545 (PMC6629371; doi:10.7554/eLife.45545)
Supplement: Figure 5—source data 2. [file elife-45545-fig5-data2.xlsx]

## Sheet: P21 sEPSCs 
WT
Animal #	Cell #	Holding potential	sEPSC count	sEPSC Frequency (Hz)	sEPSC Peak Amplitude (pA)
1	1	-70	405	1.35	-7.00925
1	2	-70	169	0.563333	-10.7335
1	3	-70	110	0.366667	-7.17441
1	4	-70	205	0.683333	-9.8996
1	5	-70	353	1.17667	-8.47403
2	6	-70	294	0.98	-11.6845
2	7	-70	207	0.69	-7.99059
2	8	-70	220	0.733333	-9.55755
2	9	-70	230	0.766667	-7.73554
3	10	-70	393	1.31	-10.3294
3	11	-70	150	0.5	-8.24382
3	12	-70	235	0.783333	-7.78912
3	13	-70	126	0.42	-9.28606
4	14	-70	120	0.4	-7.33948
4	15	-70	161	0.536667	-6.43712
4	16	-70	167	0.556667	-7.00625
Average			221.562	0.738542	-8.54314
mGFAP Smo CKO
Animal #	Cell #	Holding potential	sEPSC count	sEPSC Frequency (Hz)	sEPSC Peak Amplitude (pA)
1	1	-70	144	0.48	-10.6793
1	2	-70	103	0.343333	-8.9538
1	3	-70	182	0.606667	-8.85345
1	4	-70	447	1.49	-15.2301
1	5	-70	152	0.506667	-14.3312
2	6	-70	199	0.663333	-13.3449
2	7	-70	721	2.40333	-13.2347
2	8	-70	571	1.90333	-16.2101
2	9	-70	376	1.25333	-19.5929
3	10	-70	340	1.13333	-7.56836
3	11	-70	560	1.86667	-5.96401
3	12	-70	215	0.716667	-7.55416
3	13	-70	101	0.336667	-9.40908
4	14	-70	512	1.70667	-9.46641
4	15	-70	853	2.84333	-11.0443
4	16	-70	204	0.68	-9.88829
Average			355	1.18333	-11.3328

## Sheet: P21 mEPSCs
		WT
Animal #	Cell #	Holding potential	mEPSC count	mEPSC Frequency (Hz)	mEPSC Peak Amplitude (pA)
1	1	-70	160	0.533333	-9.38416
1	2	-70	81	0.27	-6.2919
2	3	-70	87	0.29	-9.30962
2	4	-70	84	0.28	-8.28334
2	5	-70	47	0.156667	-7.36318
2	6	-70	57	0.19	-10.4402
3	7	-70	167	0.556667	-10.8986
3	8	-70	146	0.486667	-4.03417
3	9	-70	129	0.43	-4.13525
3	10	-70	195	0.65	-8.31017
4	11	-70	79	0.263333	-7.9732
4	12	-70	247	0.823333	-5.56977
4	13	-70	143	0.476667	-6.67545
4	14	-70	83	0.276667	-6.86094
Average			121.786	0.405952	-7.53786
		mGFAP Smo CKO
Animal #	Cell #	Holding potential	mEPSC count	mEPSC Frequency (Hz)	mEPSC Peak Amplitude (pA)
1	1	-70	94	0.313333	-10.2916
1	2	-70	183	0.61	-8.34814
1	3	-70	331	1.10333	-13.3577
1	4	-70	49	0.163333	-13.8512
2	5	-70	270	0.9	-11.0428
2	6	-70	873	2.91	-12.5084
2	7	-70	307	1.02333	-11.9298
3	8	-70	301	1.00333	-6.9065
3	9	-70	231	0.77	-6.63196
4	10	-70	422	1.40667	-9.46045
4	11	-70	551	1.83667	-9.4322
Average			328.364	1.09455	-10.3419
