# Supplementary material for: Sonic hedgehog signaling in astrocytes mediates cell type-specific synaptic organization
Source: eLife. 2019 Jun 13;8:e45545. doi: 10.7554/eLife.45545 (PMC6629371; doi:10.7554/eLife.45545)
Supplement: Figure 6—source data 1. [file elife-45545-fig6-data1.xlsx]

## Sheet: Sholl
Sholl analysis
Intersections														Intersections
WT	2222-3 s8L	2222-3 s8L-2	2222-3 s9R	006-5 s7L	006-5 s8R	006-5 s8L	011-3 s8L	011-3 s8L_2	011-3 s8R	Average	SD	SE		CKO	2221-3 s6R	2221-3 s6R_2	2221-3 s6L	1707-5 s7R	1707-5 s7R_2	1707-5 s7R_3	373-9 s6L	373-9 s6L_2	373-9 s6R	Average	SD	SE
5	9	8	7	6	2	5	9	9	9	7.11111	2.42097	0.268997		5	6	6	8	8	7	2	9	8	9	7	2.17945	0.242161
10	10	9	6	12	7	10	20	22	9	11.6667	5.59017	0.62113		10	13	11	15	21	21	9	19	24	20	17	5.17204	0.574671
15	13	3	12	18	11	13	23	21	12	14	5.97913	0.664348		15	25	11	25	17	30	22	33	31	43	26.3333	9.3675	1.04083
20	11	2	4	14	2	11	26	16	21	11.8889	8.38815	0.932017		20	20	7	25	4	29	25	31	29	43	23.6667	12.0727	1.34141
25	5	0	1	7	2	11	13	7	18	7.11111	5.98841	0.665379		25	14	4	5	1	8	10	22	18	18	11.1111	7.27056	0.807841
30	0	0	1	2	2	5	5	4	9	3.11111	2.93447	0.326052		30	5	2	1	0	2	2	12	16	4	4.88889	5.46453	0.60717
35	0	0	0	1	0	0	1	1	2	0.555556	0.726483	0.0807204		35	0	0	0	0	0	0	1	9	2	1.33333	2.95804	0.328671
														40	0	0	0	0	0	0	0	0	1	0.111111	0.333333	0.037037
2222-3 s8L															2221-3 s6R
Radius(µm)	Intersections	Length(µm)													Radius(µm)	Intersections	Length(µm)
5	9	28.1													5	6	12.7
10	10	68.3													10	13	75.8
15	13	89.8													15	25	152
20	11	90.5													20	20	162.7
25	5	48.4													25	14	126.3
30	0	16.5													30	5	73.7
	48	341.6													35	0	15.7
																83	618.9
2222-3 s8L-2
Radius(µm)	Intersections	Length(µm)													2221-3 s6R_2
5	8	22.9													Radius(µm)	Intersections	Length(µm)
10	9	68.4													5	6	13.8
15	3	46.4													10	11	56
20	2	14.8													15	11	84.3
25	0	3.1													20	7	89.2
	22	155.6													25	4	56.2
															30	2	19.2
2222-3 s9R															35	0	0.8
Radius(µm)	Intersections	Length(µm)														41	319.5
5	7	20.6				WT	SmoCKO
10	6	31.2			Avg. Total Intersections	48	83								2221-3 s6L
15	12	81.8				22	41								Radius(µm)	Intersections	Length(µm)
20	4	45.8				31	79								5	8	10.8
25	1	12				60	51								10	15	87.8
30	1	5.7				26	97								15	25	155.3
35	0	2.1				55	70								20	25	183.5
	31	199.2				97	127								25	5	73.9
						80	135								30	1	17.6
006-5 s7L						80	140								35	0	0.3
Radius(µm)	Intersections	Length(µm)			Average	55.4444	91.4444									79	529.2
5	6	8.5			sd	26.4391	36.0836
10	12	67.2			se	8.81304	12.0279								1707-5 s7R
15	18	129.2			p value	0.0281063									Radius(µm)	Intersections	Length(µm)
20	14	121.4													5	8	17.9
25	7	77.1				WT	SmoCKO								10	21	127.2
30	2	32.5			Avg. Total Length	341.6	618.9								15	17	139.1
35	1	5.5				155.6	319.5								20	4	67.3
40	0	0.7				199.2	529.2								25	1	18.2
	60	442.1				442.1	370								30	0	0.3
006-5 s8R						211.2	693.4									51	370
Radius(µm)	Intersections	Length(µm)				392.4	533.6
5	2	5.6				765.6	947.5								1707-5 s7R_2
10	7	41.9				550.2	970.9								Radius(µm)	Intersections	Length(µm)
15	11	78.5				514.9	1080								5	7	12.3
20	2	50.9			Average	396.978	673.667								10	21	92.6
25	2	16.3			sd	196.94	271.561								15	30	197
30	2	11.4			se	65.6465	90.5205								20	29	226.1
35	0	6.6			p value	0.0249217									25	8	133.2
	26	211.2													30	2	24
															35	0	8.2
006-5 s8L																97	693.4
Radius(µm)	Intersections	Length(µm)
5	5	8.9													1707-5 s7R_3
10	10	46.3													Radius(µm)	Intersections	Length(µm)
15	13	96													5	2	2.2
20	11	78													10	9	38.4
25	11	94.4													15	22	131.9
30	5	58.7													20	25	191.5
35	0	10.1													25	10	135
	55	392.4													30	2	31.7
															35	0	2.9
011-3 s8L																70	533.6
Radius(µm)	Intersections	Length(µm)
5	9	11.5													373-9 s6L
10	20	129													Radius(µm)	Intersections	Length(µm)
15	23	163.6													5	9	21.9
20	26	230													10	19	119.8
25	13	141.4													15	33	188.8
30	5	62.6													20	31	260.6
35	1	22.7													25	22	210.8
40	0	4.8													30	12	114.5
	97	765.6													35	1	29
															40	0	2.1
011-3 s8L_2																127	947.5
Radius(µm)	Intersections	Length(µm)
5	9	19.5													373-9 s6L_2
10	22	108.2													Radius(µm)	Intersections	Length(µm)
15	21	179.3													5	8	11
20	16	129													10	24	107
25	7	71.9													15	31	237
30	4	32.2													20	29	240.5
35	1	9.8													25	18	168.2
40	0	0.3													30	16	105.4
	80	550.2													35	9	91.9
															40	0	9.9
011-3 s8R																135	970.9
Radius(µm)	Intersections	Length(µm)
5	9	17.6													373-9 s6R
10	9	66.4													Radius(µm)	Intersections	Length(µm)
15	12	67.1													5	9	13.3
20	21	99.5													10	20	109.3
25	18	128.7													15	43	282.3
30	9	102													20	43	362.2
35	2	31													25	18	207.9
40	0	2.6													30	4	65.9
	80	514.9													35	2	30.7
															40	1	7.2
															45	0	1.2
																140	1080

## Sheet: Branching
	WT					mGFAP Smo CKO						WT
Branch Order	006-5 s7L						2221-3 s6R					Branch Order	006-5 s7L	006-5 s8L	006-5 s8L	011-3 s8R	011-3 s8L	011-3 s8L_2	2222-3 s9R	2222-3 s8L	2222-3 s8L_2	Avg.
	Order	Qty	Length total(µm)			Order	Qty	Length total(µm)				1	8	5	6	5	13	9	5	6	8	7.22222
	1	8	86.1			1	6	30.2				2	12	10	10	8	20	14	6	10	8	10.8889
	2	12	40.3			2	13	116.3				3	14	14	6	14	28	18	7	14	2	13
	3	14	30.7			3	17	138.6				4	11	11	4	21	25	17	10	11	2	12.4444
	4	11	188.4			4	16	143.4				5	12	14	4	12	22	14	6	6	0	10
	5	12	44.3			5	16	94.9				6	7	7		4	10	2	4	2	0	4.5
	6	7	30.5			6	12	52.2				7	2	6			6				0	3.5
	7	2	10.5			7	4	24.4				8		2			2				0	1.33333
			11.4			8	2	18.9
	006-5 s8L											mGFAP Smo CKO
	Order	Qty	Length total(µm)			2221-3 s6L						Branch Order	2221-3 s6R	2221-3 s6L	2221-3 s6R_2	373-9 s6R	373-9 s6L	373-9 s6L_2	1707-5 s7R	1707-5 s7R_2	1707-5 s7R_3	Avg.
	1	5	36.7			Order	Qty	Length total(µm)				1	6	8	4	8	11	7	4	8	12	7.55556
	2	10	91.3			1	8	40.8				2	13	16	8	16	25	13	8	16	15	14.4444
	3	14	131.4			2	16	114.6				3	17	20	12	26	28	17	12	23	20	19.4444
	4	11	37.2			3	20	122.2				4	16	22	11	42	26	23	14	20	16	21.1111
	5	14	95.8			4	22	197				5	16	10	8	28	26	26	15	12	12	17
	6	7				5	10	54.7				6	12		8	20	16	21	8	10	4	12.375
	7	6										7	4			12	16	15	7	11		10.8333
	8	2				2221-3 s6R_2						8	2			8	2	2	2	4		3.33333
						`	Qty	Length total(µm)				9				6			2	2		3.33333
	006-5 s8L					1	4	17.7
	Order	Qty	Length total(µm)			2	8	60.9
	1	6	29.4			3	12	69.9
	2	10	8.2			4	11	75.3
	3	6	60.7			5	8	47.8
	4	4	26.7			6	8	48
	5	4	64.7
			21.5			373-9 s6R
	011-3 s8R						Order	Qty	Length total(µm)
	Order	Qty	Length total(µm)				1	8	44.6
	1	5	31.7				2	16	125.9
	2	8	65.1				3	26	169.2
	3	14	82.2				4	42	263.8
	4	21	181				5	28	180
	5	12	122.8				6	20	138.4
	6	4	32				7	12	68.5
							8	8	61.8
	011-3 s8L						9	6	28
	Order	Qty	Length total(µm)
	1	13	94.3				373-9 s6L
	2	20	126.7				Order	Qty	Length total(µm)
	3	28	177.6				1	11	71.1
	4	25	132.2				2	25	227.6
	5	22	137.1				3	28	154.2
	6	10	58.1				4	26	160.8
	7	6	33.6				5	26	146.2
	8	2	6.1				6	16	79.9
							7	16	102.7
	011-3 s8L_2						8	2	4.9
	Order	Qty	Length total(µm)
	1	9	66.2				373-9 s6L_2
	2	14	106.8				Order	Qty	Length total(µm)
	3	18	129.2				1	7	41.5
	4	17	132.6				2	13	104.4
	5	14	100.2				3	17	112.4
	6	2	15.2				4	23	206.8
							5	26	229.6
	2222-3 s9R						6	21	171
	Order	Qty	Length total(µm)				7	15	99.9
	1	5	19.7				8	2	5.5
	2	6	35.3
	3	7	40.4				1707-5 s7R
	4	10	38.5				Order	Qty	Length total(µm)
	5	6	34.1				1	4	9.3
	6	4	31.1				2	8	40.8
							3	12	60.6
	2222-3 s8L						4	14	65.1
	Order	Qty	Length total(µm)				5	15	76.5
	1	6	27.3				6	8	39
	2	10	79.5				7	7	56.3
	3	14	107.7				8	2	5.5
	4	11	79.5				9	2	16.8
	5	6	35.8
	6	2	11.5				1707-5 s7R_2
							Order	Qty	Length total(µm)
	2222-3 s8L_2						1	8	59.9
	Order	Qty	Length total(µm)				2	16	94.9
	1	8	43.5				3	23	162.6
	2	8	70.3				4	20	157.2
	3	2	10.5				5	12	50.7
	4	2	31.2				6	10	73.7
							7	11	59.2
							8	4	23
							9	2	12.3
							1707-5 s7R_3
							Order	Qty	Length total(µm)
							1	12	99.7
							2	15	95.8
							3	20	161.6
							4	16	88.7
							5	12	67.2
							6	4	20.6

## Sheet: Tree Length
WT			mGFAP Smo CKO				Longest tree
006-5 s7L			373-9 s6R				WT	SmoCKO
Tree	Length total(µm)		Tree	Length total(µm)			188.4	346.9
1	86.1		1	346.9			131.4	189.2
2	40.3		2	5.8			64.7	354
3	30.7		3	96			190.8	182.5
4	188.4		4	89.5			197	228.4
5	44.3		5	43.5			144.6	123
6	30.5		6	67.4			136.5	163.9
7	10.5		7	90.8			102	194.5
8	11.4		8	340.3			73.7	126.4
						Average	136.567	212.089
006-5 s8L			373-9 s6L
Tree	Length total(µm)		Tree	Length total(µm)
1	36.7		1	122.5
2	91.3		2	15.4
3	131.4		3	97.2
4	37.2		4	52			# Trees
5	95.8		5	70.3			WT	SmoCKO
			6	148.8			8	8
006-5 s8R			7	148.8			5	11
Tree	Length total(µm)		8	189.2			6	7
1	29.4		9	28.4			5	4
2	8.2		10	33.7			13	8
3	60.7		11	41.2			9	12
4	26.7						5	6
5	64.7		373-9 s6L_2				6	4
6	21.5		Tree	Length total(µm)			8	8
			1	354		Average	7.22222	7.55556
011-3 s8R			2	150.8
Tree	Length total(µm)		3	175.1
1	58.3		4	61.2
2	120.7		5	50.9
3	190.8		6	18.1
4	15.8		7	160.8
5	129.1
			1707-5 s7R
011-3 s8L			Tree	Length total(µm)
Tree	Length total(µm)		1	67.6
1	158.4		2	182.5
2	98.6		3	41.6
3	17.2		4	78.3
4	6.3
5	36.2		1707-5 s7R_2
6	26.2		Tree	Length total(µm)
7	42.8		1	113
8	35.8		2	63.2
9	66.6		3	51.2
10	15.1		4	36.3
11	14.4		5	21
12	51		6	56.1
13	197		7	124.1
			8	228.4
011-3 s8L_2
Tree	Length total(µm)		1707-5 s7R_3
1	89.1		Tree	Length total(µm)
2	144.6		1	9.4
3	59.5		2	123
4	16.6		3	6.3
5	57.2		4	22.7
6	43.8		5	111.7
7	24.2		6	22.3
8	105.2		7	110.6
9	10		8	18.7
			9	40.6
2222-3 s9R			10	43.8
Tree	Length total(µm)		11	15.3
1	14.8		12	9.1
2	39.1
3	5.4		2221-3 s6R
4	136.5		Tree	Length total(µm)
5	3.3		1	163.9
			2	26.1
2222-3 s8L			3	205
Tree	Length total(µm)		4	41.2
1	43.6		5	138.8
2	78.6		6	43.9
3	61
4	53.4		2221-3 s6R_2
5	102		Tree	Length total(µm)
6	2.8		1	52.8
			2	43.7
2222-3 s8L_2			3	28.5
Tree	Length total(µm)		4	194.5
1	73.7
2	1.8		2221-3 s6L
3	7.6		Tree	Length total(µm)
4	9.1		1	46.4
5	21.2		2	126.4
6	21.4		3	106.4
7	14.8		4	42.3
8	5.9		5	82.4
			6	3.4
			7	34.1
			8	87.8
