# Supplementary material for: Sonic hedgehog signaling in astrocytes mediates cell type-specific synaptic organization
Source: eLife journal article supplement (doi:10.7554/elife.45545), 2019-06-13
Supplement: supp [file elife-45545-supp-v1.zip]

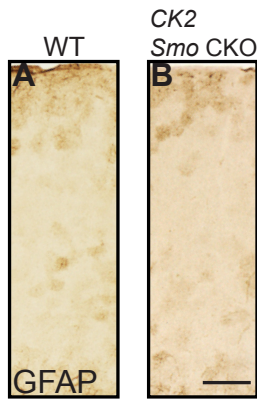

**Figure 6 – figure supplement 1:**  
**Reactive gliosis does not occur**  
**when neuronal Shh signaling**  
**is disrupted.** Brightfield  
 immunohistochemistry for  
 GFAP in the cortex of an adult  
*CamKIIa;Smo<sup>fl/fl</sup>* animal (B) and  
 littermate control (A) shows  
 comparable levels of GFAP  
 expression. Scale bar, 125  $\mu$ m.
