# Supplementary material for: Sonic hedgehog signaling in astrocytes mediates cell type-specific synaptic organization
Source: eLife journal article supplement (doi:10.7554/elife.45545), 2019-06-13
Supplement: supp [file elife-45545-supp-v1.zip]

|                                 | WT (n = 11 cells)  | <i>Gfap Smo</i> CKO (n = 7 cells) | <i>p</i> value |
|---------------------------------|--------------------|-----------------------------------|----------------|
| Input resistance (M $\Omega$ )  | 130.6 $\pm$ 21.52  | 97.93 $\pm$ 11.49                 | 0.15           |
| Resting membrane potential (mV) | -59.37 $\pm$ 2.059 | -63.73 $\pm$ 3.248                | 0.25           |
| Tau (ms)                        | 11.76 $\pm$ 0.71   | 11.75 $\pm$ 1.398                 | 0.79           |

**Figure 5 – figure supplement 1.** Membrane properties of *Gfap Smo* CKO layer V pyramidal neurons. There is a significant decrease in input resistance (M $\Omega$ ) in *Gfap Smo* CKO neurons compared to WT neurons. No significant differences were observed in resting membrane potential (mV), rheobase (pA), and tau (ms) in *Gfap Smo* CKO neurons. Statistical significance was assessed by Mann-Whitney U test (input resistance and tau) and unpaired Student's t-test (resting membrane potential).
