# Supplementary material for: Sonic hedgehog signaling in astrocytes mediates cell type-specific synaptic organization
Source: eLife journal article supplement (doi:10.7554/elife.45545), 2019-06-13
Supplement: supp [file elife-45545-supp-v1.zip]

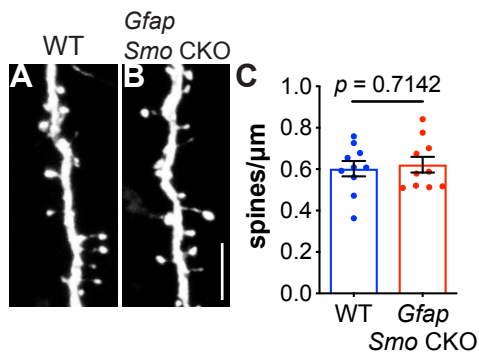

**Figure 2 – figure supplement 3: Spine density on layer V basal dendrites are not affected in adult *Gfap Smo CKO* mice.** (A-B) Representative images of basal dendrites analyzed from layer V neurons expressing *Thy1GFPm* in both WT (*Smo<sup>fl/fl</sup>*) and *Gfap Smo CKO* (*Gfap-Cre; Smo<sup>fl/fl</sup>*) animals. Scale bar, 5 μm. (C) Graph comparing the density of spines on basal dendrites from WT and *Gfap Smo CKO* animals. Data points represent individual cells, bars represent mean ± SEM. Statistical significance was assessed using unpaired Student's t-test. *n* = 3 animals per genotype.
