# Supplementary material for: Sonic hedgehog signaling in astrocytes mediates cell type-specific synaptic organization
Source: eLife journal article supplement (doi:10.7554/elife.45545), 2019-06-13
Supplement: supp [file elife-45545-supp-v1.zip]

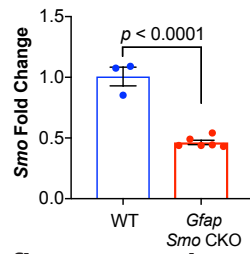

**Figure 2 - figure supplement 2: *Gfap* *Smo* CKO mice have reduced levels of *Smo*.** Quantitative PCR of cortical RNA shows a significant reduction in *Smo* expression. Data points represent individual animals, bars represent mean  $\pm$  SEM. Statistical analysis assessed by unpaired Student's t-test.
