# Supplementary material for: Sonic hedgehog signaling in astrocytes mediates cell type-specific synaptic organization
Source: eLife journal article supplement (doi:10.7554/elife.45545), 2019-06-13
Supplement: supp [file elife-45545-supp-v1.zip]

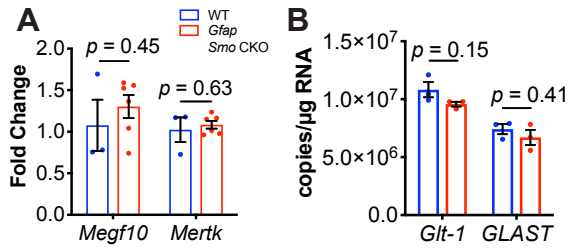

**Figure 4 – figure supplement 1: Quantitative PCR analysis of known spine and synapse modulators show no change in expression in *Gfap Smo* CKO mice. (A)** Quantitative PCR shows no change in *Megf10* or *Mertk* in *Gfap Smo* CKO animals compared to controls ( $n = 3$  and 6 samples of cortical RNA from WT and *Gfap Smo* CKO animals, respectively). Statistical significance assessed by unpaired Student's t-test of the quantification cycles for each sample. **(B)** Droplet digital PCR shows no difference in the number of transcripts of either *GLT-1* or *GLAST* in *Gfap Smo* CKO animals ( $n = 3$  cortical RNA samples per genotype). Data points represent individual animals, bars represent mean  $\pm$  SEM. Statistical significance assessed by unpaired Student's t-test of the copy number for each target in each genotype.
