# Supplementary figures and images for: Sonic hedgehog signaling in astrocytes mediates cell type-specific synaptic organization
Source: eLife journal article supplement (doi:10.7554/elife.45545), 2019-06-13

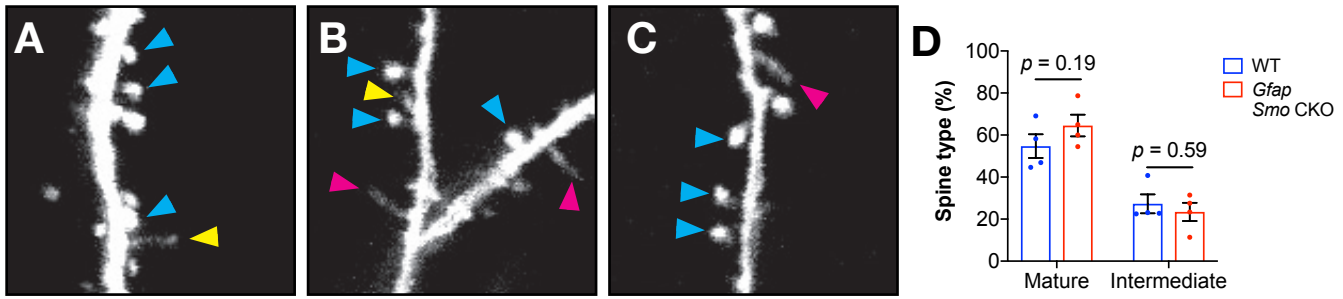

Supplement: supp [file elife-45545-supp-v1.zip]

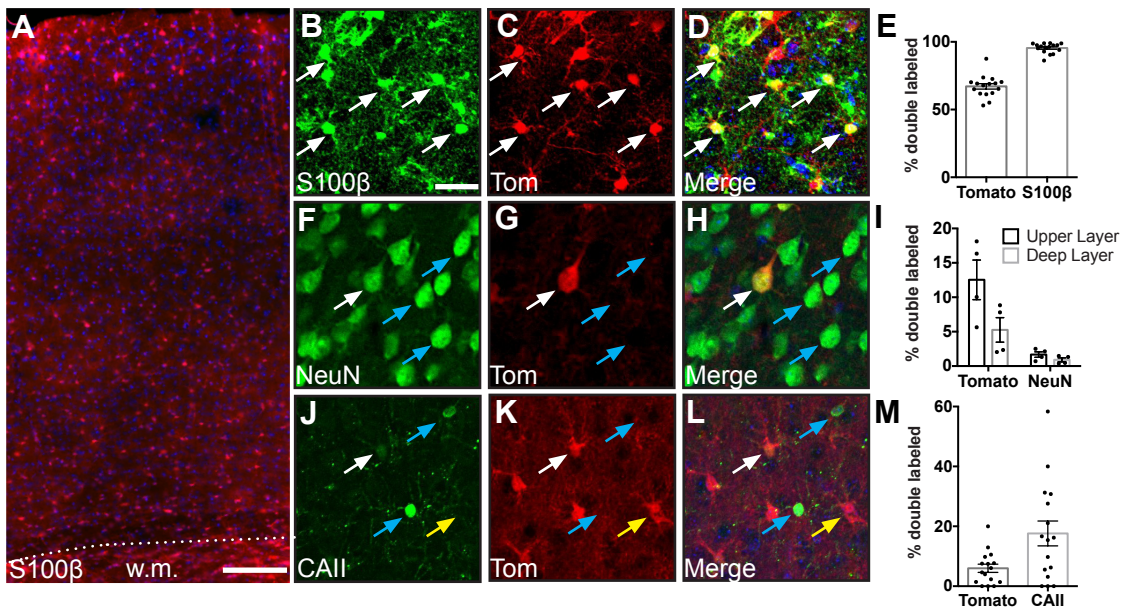

Supplement: supp [file elife-45545-supp-v1.zip]
